# Supplementary material for: Two-photon controlled sol–gel condensation for the microfabrication of silica based microstructures. The role of photoacids and photobases
Source: Royal Society of Chemistry journal article supplement (doi:10.1039/c7ra08608c), 2017-01-01
Supplement: c7ra08608c1.pdf [file c7ra08608c1.pdf]

## Two-photon controlled sol-gel condensation for the microfabrication of silica based microstructures. Role of the photoacids and photobases.

J. Kustra, E. Martin, D. Chateau, F. Lerouge, C. Monnereau, C. Andraud, M. Sitarz, P. L. Baldeck, S. Parola

### Supplementary Information

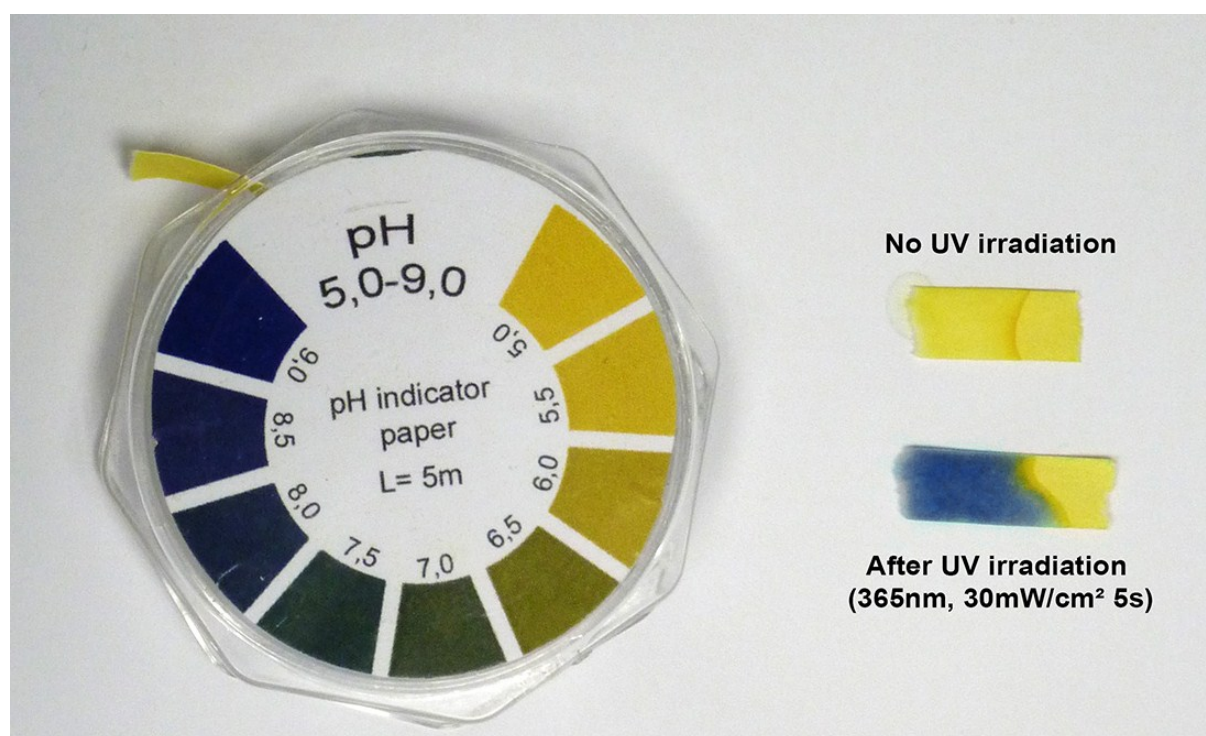

Figure S1. pH change induced under UV excitation of the N-methylnifedipine ethyl ester derivative (pH taken from a water/alcohol (2/1) solution at concentration of 1g/L).

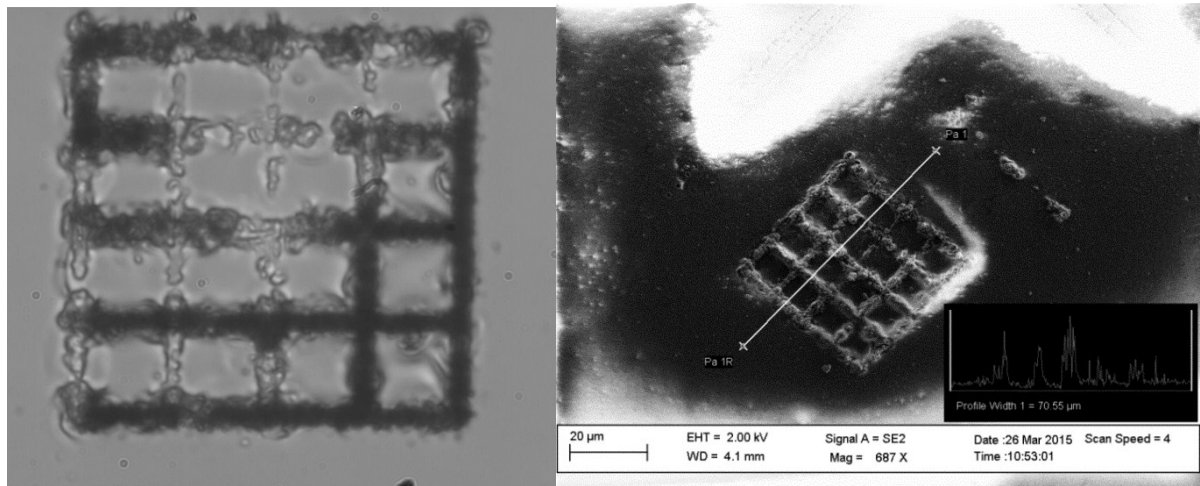

Figure S2. Optical image (left) and SEM image (right) showing the microfabrication of hybrid silica based materials using 2 photons photoinduced condensation at the laser focal point. The profile of the fabrication shows inhomogeneity along the sample (right inserted image).
